# Supplementary material
Source: PubMed Central journal article supplement (PMC8728103)

# Suppl. Figure 1

## A

| Cell Line | Variant Type    | AA Change       | VAF  |
|-----------|-----------------|-----------------|------|
| HS766T    | Nonsense        | Gln538*         | 0.66 |
| MIAAPACA2 | Nonsense        | Gln321*         | 1.00 |
| MIAAPACA2 | Missense        | Pro1940Leu      | 0.30 |
| PANC0203  | Missense        | Thr572Met       | 0.61 |
| PANC0203  | Missense        | Leu2022Pro      | 0.75 |
| PATC148   | Nonsense        | Gln1650*        | 0.30 |
| PATC53    | Missense        | Pro158Ser       | 0.98 |
| PATC53    | Frame Shift Ins | Ser186fs        | 1.00 |
| SNU324    | In-Frame Ins    | 1334_1335insGln | 0.50 |
| SNU324    | Frame Shift Del | Glu1687fs       | 0.38 |
| SUIT2     | Nonsense        | Gln546*         | 0.56 |

## B

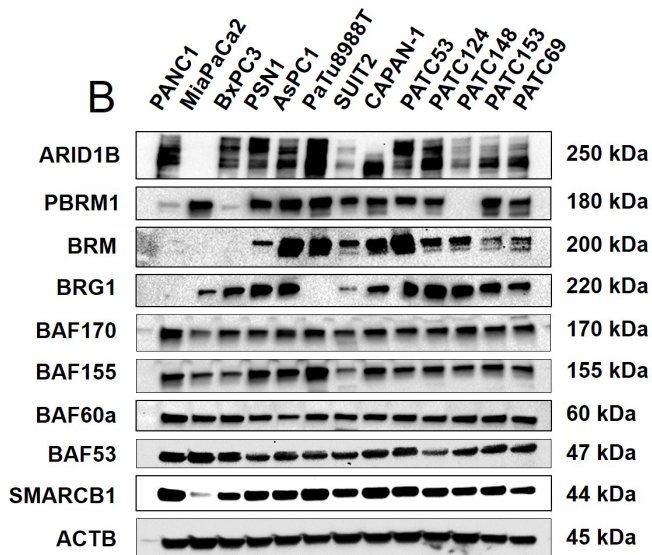

## C

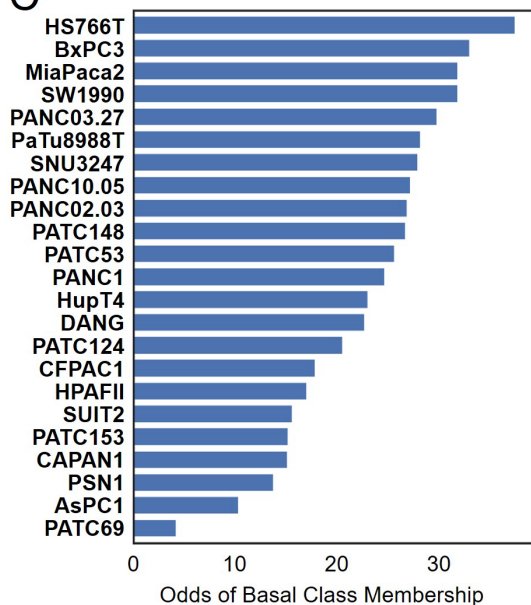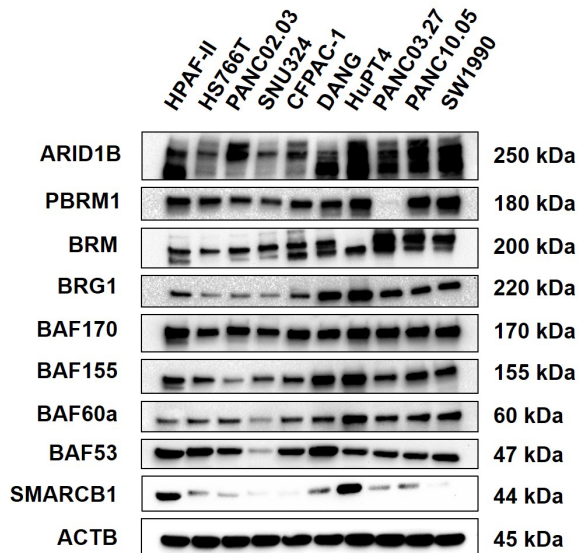

Supplement: NIHMS1645735-supplement-1.pdf [file NIHMS1645735-supplement-1.pdf]
