# Supplementary material
Source: PubMed Central journal article supplement (PMC8728103)

# Suppl. Figure 2

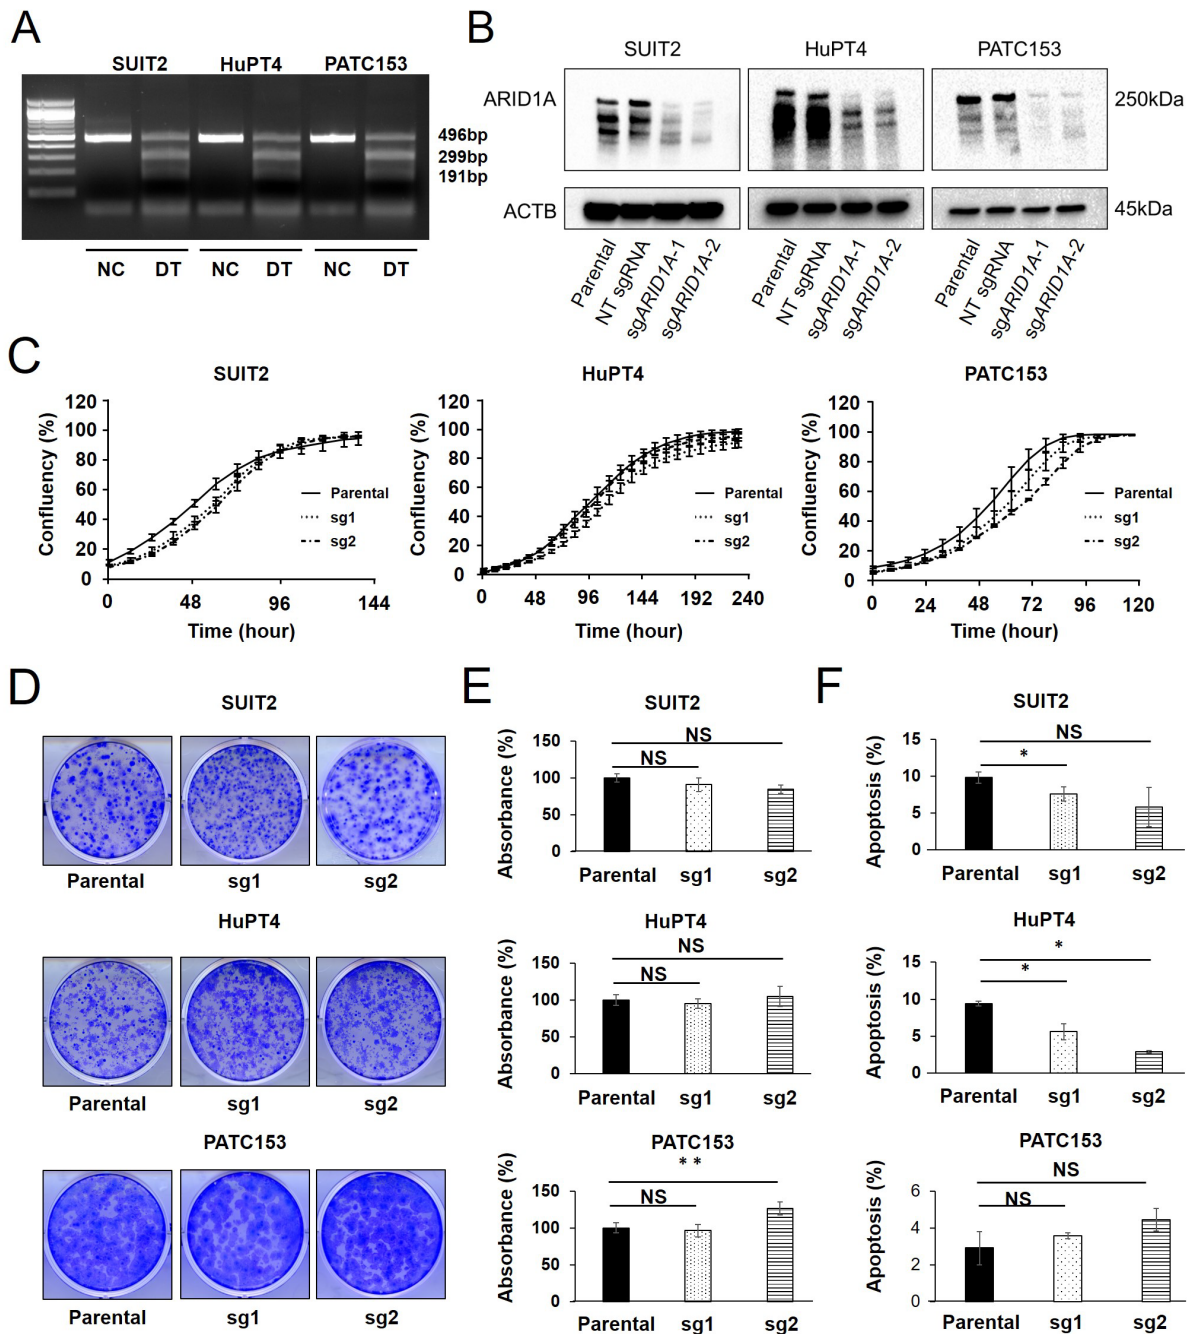

Supplement: NIHMS1645735-supplement-2.pdf [file NIHMS1645735-supplement-2.pdf]

# Suppl. Figure 3

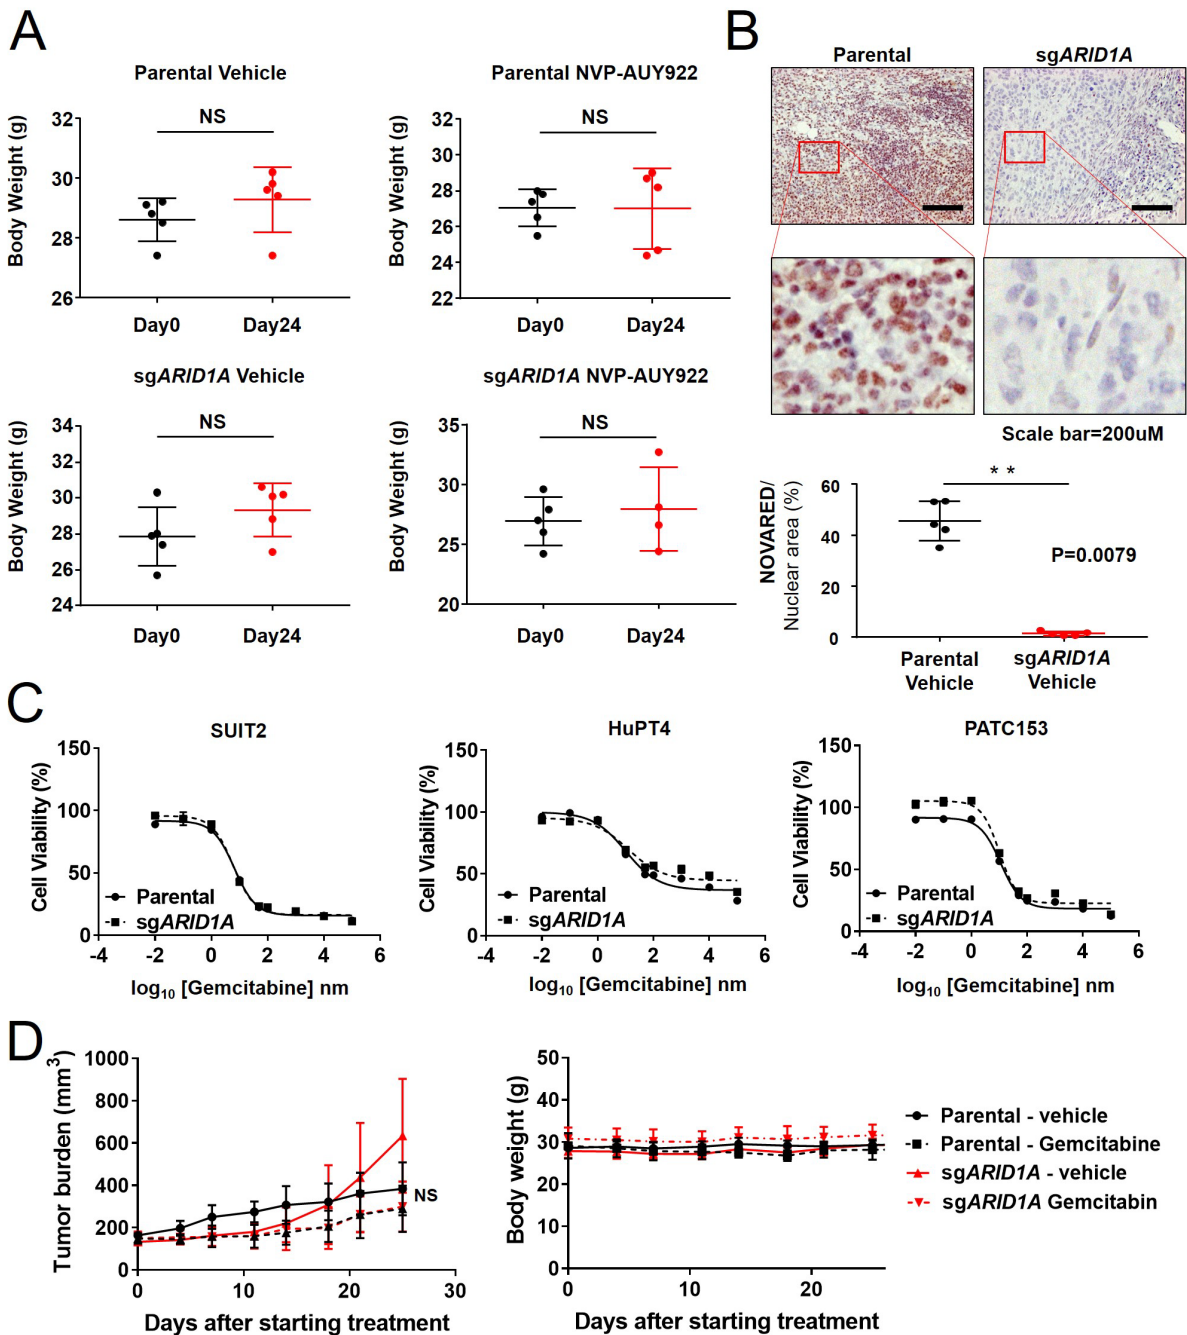

Supplement: NIHMS1645735-supplement-3.pdf [file NIHMS1645735-supplement-3.pdf]
